# Supplementary material for: Infection success of Echinoparyphium aconiatum (Trematoda) in its snail host under high temperature: role of host resistance
Source: PubMed Central journal article supplement (PMC4021695; doi:10.1186/1756-3305-7-192), 2014-04-21
Supplement: 1756-3305-7-192-S1.pdf [file 1756-3305-7-192-S1.pdf]

## Additional file 1

### *Statistical analyses*

To analyse differences in the shell length of snails among treatments at the end of the experiments, generalized linear models were performed for both experiments. In these models, shell length was used as a response variable (identity link function), maintenance temperature (15°C, 25°C) and maintenance time (3 days, 7 days) before parasite exposure were used as fixed factors.

### *Results*

Shell length at the end of the experiments did not depend on experimental treatments (Tables A1, A2).

Table A1: GLM for the shell length of *L. stagnalis* by maintenance temperature (15°C, 25°C) and maintenance time (3 days, 7 days) before parasite exposure in the first experiment.

|                             | Wald Chi-Square | df | <i>p</i> |
|-----------------------------|-----------------|----|----------|
| maintenance temperature (T) | 0.201           | 1  | 0.654    |
| maintenance time (D)        | 3.210           | 1  | 0.073    |
| T × D                       | 0.136           | 1  | 0.712    |

Table A2: GLM for the shell length of *L. stagnalis* by maintenance temperature (15°C, 25°C) and maintenance time (3 days, 7 days) before parasite exposure in the second experiment.

|                             | Wald Chi-Square | df | <i>p</i> |
|-----------------------------|-----------------|----|----------|
| maintenance temperature (T) | 1.408           | 1  | 0.235    |
| maintenance time (D)        | 0.762           | 1  | 0.383    |
| T × D                       | 0.010           | 1  | 0.921    |
